# Supplementary material for: Expectation maximization based framework for joint localization and parameter estimation in single particle tracking from segmented images
Source: PLOS journal article supplement (doi:10.1371/journal.pone.0243115), 2021-05-21
Supplement: S3 (10.1371/journal.pone.0243115.s003) [file journal.pone.0243115.s003]

### S3 Text. Gain and covariance simulation based on statistical data.

Our specific model for an sCMOS camera is based on that of Ref. [38](#) of the main paper. That work used a Hamamatsu ORCA Flash 4.0 camera and provided experimental data on the pixel-by-pixel variance and gain. We fit the variance data with the model

$$\log_{10} \text{Occurance} = a \cdot \exp(-b \cdot \text{variance}), \quad (1)$$

finding the best fit parameters to be  $a = 4.734$ ,  $b = -0.001799$ . Similarly, we fit the gain data to the model

$$\log_{10} \text{Occurance} = a_1 \cdot \exp\left(-\left(\frac{g - b_1}{c_1}\right)^2\right) + a_2 \cdot \exp\left(-\left(\frac{g - b_2}{c_2}\right)^2\right), \quad (2)$$

leading to the values

$$a_1 = 2.215, b_1 = 2.19, c_1 = 0.07661, a_2 = 2.68, b_2 = 2.249, c_2 = 0.216$$

.

In the figure below we show maps of the pixel-dependent variance and gain for an  $512 \times 512$  image respectively as well as the curve fitting results.

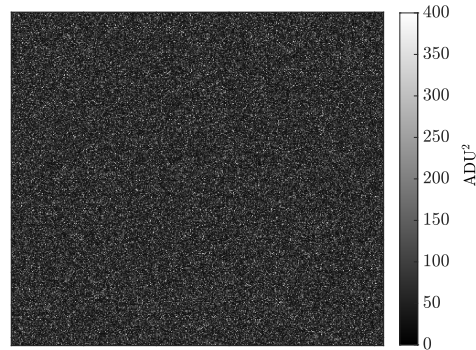

(a) Simulated variance map.

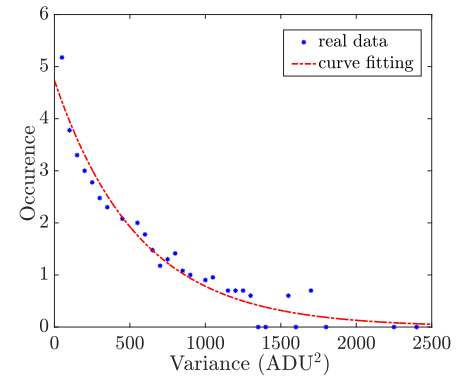

(b) Variance curve-fitting.

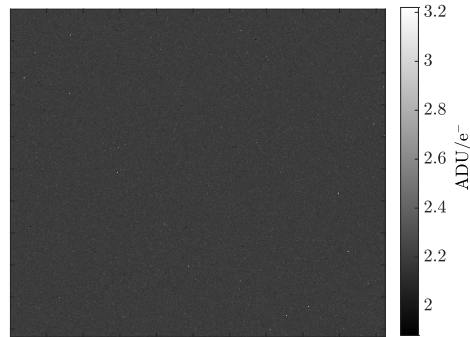

(c) Simulated gain map.

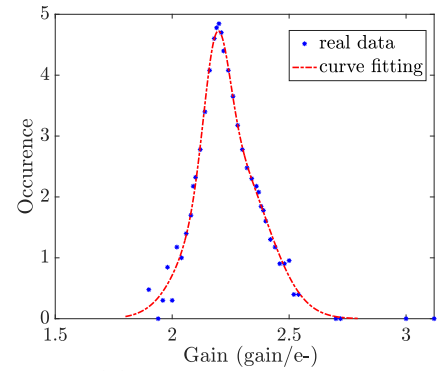

(d) Gain curve-fitting.

Simulated maps and histograms of the pixel-dependent readout noise.
